# Supplementary material
Source: PubMed Central journal article supplement (PMC4517292)
Supplement: NIHMS683468-supplement-01.pdf [file NIHMS683468-supplement-01.pdf]

**Supplemental digital content: Primary reasons for rehospitalizations**

| <u>Rehospitalization reason</u> | <u>Rehospitalization anytime post-discharge to follow up period</u> |                                       | <u>Rehospitalization during first month post discharge*</u> |                                       |
|---------------------------------|---------------------------------------------------------------------|---------------------------------------|-------------------------------------------------------------|---------------------------------------|
|                                 | <u>Rehospitalization frequency</u>                                  | <u>Number of individuals involved</u> | <u>Rehospitalization frequency</u>                          | <u>Number of individuals involved</u> |
|                                 | <u>(n,%)</u>                                                        | <u>(n,%)</u>                          | <u>(n,%)</u>                                                | <u>(n,%)</u>                          |
| <b>Cancer</b>                   | <b>9 (1%)</b>                                                       | <b>6 (&lt;1%)</b>                     | <b>3 (3%)</b>                                               | <b>2 (2%)</b>                         |
| Colon                           | 33%                                                                 | 17%                                   | 0%                                                          | 0%                                    |
| Cholangiocarcinoma              | 22%                                                                 | 17%                                   | 67%                                                         | 50%                                   |
| Abdominal                       | 11%                                                                 | 17%                                   | 0%                                                          | 0%                                    |
| Bladder                         | 11%                                                                 | 17%                                   | 0%                                                          | 0%                                    |
| Laryngeal                       | 11%                                                                 | 17%                                   | 0%                                                          | 0%                                    |
| Lung                            | 11%                                                                 | 17%                                   | 33%                                                         | 50%                                   |
| <b>Cardiac</b>                  | <b>38 (5%)</b>                                                      | <b>28 (4%)</b>                        | <b>4 (3%)</b>                                               | <b>4 (4%)</b>                         |
| Unknown                         | 32%                                                                 | 25%                                   | 0%                                                          | 0%                                    |
| Syncope                         | 24%                                                                 | 25%                                   | 25%                                                         | 25%                                   |
| Chest pain                      | 11%                                                                 | 11%                                   | 25%                                                         | 25%                                   |
| Myocardial infarction           | 11%                                                                 | 14%                                   | 0%                                                          | 0%                                    |
| Congestive heart failure        | 8%                                                                  | 4%                                    | 25%                                                         | 25%                                   |
| Stent                           | 5%                                                                  | 7%                                    | 0%                                                          | 0%                                    |
| Atrial fibrillation             | 3%                                                                  | 4%                                    | 0%                                                          | 0%                                    |
| Bradycardia                     | 3%                                                                  | 4%                                    | 25%                                                         | 25%                                   |
| Cardiac arrest                  | 3%                                                                  | 4%                                    | 0%                                                          | 0%                                    |
| Pacemaker                       | 3%                                                                  | 4%                                    | 0%                                                          | 0%                                    |
| <b>Dermatologic</b>             | <b>2 (&lt;1%)</b>                                                   | <b>1 (1%)</b>                         | <b>0</b>                                                    | <b>0</b>                              |
| Pressure ulcer                  | 100%                                                                | 100%                                  | 0%                                                          | 0%                                    |
| <b>Endocrine</b>                | <b>12 (2%)</b>                                                      | <b>7 (1%)</b>                         | <b>1 (&lt;1%)</b>                                           | <b>1 (&lt;1%)</b>                     |
| Diabetes                        | 92%                                                                 | 86%                                   | 100%                                                        | 100%                                  |
| Pituitary issue                 | 8%                                                                  | 14%                                   | 0%                                                          | 0%                                    |
| <b>Gastrointestinal</b>         | <b>36 (5%)</b>                                                      | <b>31 (5%)</b>                        | <b>6 (5%)</b>                                               | <b>4 (4%)</b>                         |
| Feeding tube                    | 19%                                                                 | 21%                                   | 33%                                                         | 40%                                   |
| Cholecystectomy                 | 17%                                                                 | 18%                                   | 33%                                                         | 40%                                   |
| Emesis                          | 14%                                                                 | 6%                                    | 33%                                                         | 20%                                   |
| Hernia/ hernia repair           | 11%                                                                 | 12%                                   | 0%                                                          | 0%                                    |
| Cholecystitis                   | 6%                                                                  | 6%                                    | 0%                                                          | 0%                                    |
| Diverticulitis                  | 6%                                                                  | 6%                                    | 0%                                                          | 0%                                    |
| Colostomy reversal              | 6%                                                                  | 6%                                    | 0%                                                          | 0%                                    |
| Unknown                         | 6%                                                                  | 6%                                    | 0%                                                          | 0%                                    |
| Abdominal pain                  | 3%                                                                  | 3%                                    | 0%                                                          | 0%                                    |
| Appendectomy                    | 3%                                                                  | 3%                                    | 0%                                                          | 0%                                    |
| Autoimmune hepatitis            | 3%                                                                  | 3%                                    | 0%                                                          | 0%                                    |
| Gastrointestinal bleed          | 3%                                                                  | 3%                                    | 0%                                                          | 0%                                    |
| Hepatic encephalopathy          | 3%                                                                  | 3%                                    | 0%                                                          | 0%                                    |

|                                                |                   |                   |                   |                   |
|------------------------------------------------|-------------------|-------------------|-------------------|-------------------|
| Pancreatitis                                   | 3%                | 3%                | 0%                | 0%                |
| <b>General</b>                                 | <b>47 (6%)</b>    | <b>33 (5%)</b>    | <b>8 (7%)</b>     | <b>7 (7%)</b>     |
| Unknown                                        | 38%               | 50%               | 63%               | 63%               |
| Anemia                                         | 23%               | 3%                | 0%                | 0%                |
| Thrombocytopenia                               | 9%                | 6%                | 0%                | 0%                |
| Inferior vena cava filter removal              | 6%                | 9%                | 0%                | 0%                |
| Abdominal wound                                | 4%                | 6%                | 0%                | 0%                |
| Hemorrhage                                     | 4%                | 6%                | 13%               | 13%               |
| Pain, location not specified                   | 4%                | 6%                | 0%                | 0%                |
| Bowel fistula                                  | 2%                | 3%                | 13%               | 13%               |
| Breast surgery                                 | 2%                | 3%                | 0%                | 0%                |
| Decline, reason unknown                        | 2%                | 3%                | 0%                | 0%                |
| Hypotension                                    | 2%                | 3%                | 13%               | 13%               |
| Thoracic surgery                               | 2%                | 3%                | 0%                | 0%                |
| <b>Genitourinary/Nephrology</b>                | <b>15 (2%)</b>    | <b>9 (1%)</b>     | <b>3 (3%)</b>     | <b>2 (2%)</b>     |
| Nephrolithiasis                                | 53%               | 44%               | 100%              | 100%              |
| Prostate                                       | 20%               | 22%               | 0%                | 0%                |
| Renal failure                                  | 13%               | 11%               | 0%                | 0%                |
| Kidney transplant                              | 7%                | 11%               | 0%                | 0%                |
| Unknown                                        | 7%                | 11%               | 0%                | 0%                |
| <b>Gynecologic</b>                             | <b>4 (&lt;1%)</b> | <b>3 (&lt;1%)</b> | <b>1 (&lt;1%)</b> | <b>1 (&lt;1%)</b> |
| Hysterectomy                                   | 50%               | 33%               | 0%                | 0%                |
| Miscarriage                                    | 25%               | 33%               | 100%              | 100%              |
| Unknown                                        | 25%               | 33%               | 0%                | 0%                |
| <b>Infectious</b>                              | <b>120 (15%)</b>  | <b>89 (14%)</b>   | <b>21 (18%)</b>   | <b>20 (18%)</b>   |
| Unknown                                        | 45%               | 42%               | 29%               | 29%               |
| Urinary tract infection                        | 18%               | 17%               | 10%               | 10%               |
| Pneumonia                                      | 17%               | 18%               | 14%               | 14%               |
| Empyema                                        | 3%                | 2%                | 5%                | 5%                |
| Infected hardware                              | 3%                | 3%                | 0%                | 0%                |
| Methicillin-resistant<br>Staphylococcus aureus | 3%                | 3%                | 10%               | 10%               |
| Brain abscess                                  | 2%                | 2%                | 0%                | 0%                |
| Clostridium difficile                          | 2%                | 2%                | 10%               | 10%               |
| Sepsis                                         | 2%                | 2%                | 5%                | 5%                |
| Staphylococcus                                 | 2%                | 2%                | 0%                | 0%                |
| Abscess, location unspecified                  | <1%               | 1%                | 0%                | 0%                |
| Bone infection                                 | <1%               | 1%                | 0%                | 0%                |
| Pump infection                                 | <1%               | 1%                | 0%                | 0%                |
| Pyelonephritis                                 | <1%               | 1%                | 0%                | 0%                |
| Shunt infection                                | <1%               | 1%                | 5%                | 5%                |
| Throat infection                               | <1%               | 1%                | 5%                | 5%                |
| Wound closure                                  | <1%               | 1%                | 5%                | 5%                |
| <b>Injury/External Cause</b>                   | <b>55 (7%)</b>    | <b>49 (8%)</b>    | <b>13 (11%)</b>   | <b>13 (13%)</b>   |
| Fall                                           | 20%               | 17%               | 15%               | 15%               |
| Head trauma (due to fall)                      | 18%               | 19%               | 23%               | 23%               |

|                                              |                   |                   |                   |                   |
|----------------------------------------------|-------------------|-------------------|-------------------|-------------------|
| Medication toxicity/side effect              | 18%               | 17%               | 23%               | 23%               |
| Fracture (due to fall)                       | 13%               | 14%               | 23%               | 23%               |
| Fracture (cause unknown)                     | 7%                | 8%                | 8%                | 8%                |
| Motor vehicle crash (injuries unknown)       | 7%                | 8%                | 0%                | 0%                |
| Head trauma (cause unknown)                  | 6%                | 6%                | 8%                | 8%                |
| Fracture (due to motor vehicle crash)        | 4%                | 4%                | 0%                | 0%                |
| Traumatic brain injury                       | 4%                | 4%                | 0%                | 0%                |
| Dog fight                                    | 2%                | 2%                | 0%                | 0%                |
| Heat exhaustion                              | 2%                | 2%                | 0%                | 0%                |
| <b>Lymphatic</b>                             | <b>1 (&lt;1%)</b> | <b>1 (&lt;1%)</b> | <b>1 (&lt;1%)</b> | <b>1 (&lt;1%)</b> |
| Edema                                        | 100%              | 100%              | 100%              | 100%              |
| <b>Neurologic</b>                            | <b>99 (13%)</b>   | <b>84 (13%)</b>   | <b>16 (14%)</b>   | <b>14 (13%)</b>   |
| Seizure                                      | 64%               | 59%               | 56%               | 60%               |
| Non-seizure                                  | 16%               | 19%               | 19%               | 20%               |
| Mental status change                         | 5%                | 6%                | 6%                | 7%                |
| Stroke                                       | 5%                | 6%                | 6%                | 7%                |
| Headache                                     | 4%                | 5%                | 0%                | 0%                |
| Dizziness                                    | 2%                | 2%                | 0%                | 0%                |
| Shaking                                      | 2%                | 1%                | 13%               | 7%                |
| Spasticity                                   | 1%                | 1%                | 0%                | 0%                |
| Unknown                                      | 1%                | 1%                | 0%                | 0%                |
| <b>Neurosurgical</b>                         | <b>84 (11%)</b>   | <b>78 (12%)</b>   | <b>10 (9%)</b>    | <b>10 (9%)</b>    |
| Cranioplasty                                 | 60%               | 60%               | 70%               | 70%               |
| Hydrocephalus                                | 7%                | 8%                | 0%                | 0%                |
| Laminectomy/discectomy/fusion /stabilization | 6%                | 6%                | 0%                | 0%                |
| Baclofen pump placement/removal/reinsertion  | 5%                | 4%                | 10%               | 10%               |
| Cerebrospinal fluid leak                     | 5%                | 4%                | 0%                | 0%                |
| Craniotomy                                   | 4%                | 4%                | 10%               | 10%               |
| Aneurysm                                     | 2%                | 3%                | 0%                | 0%                |
| Brachial plexus                              | 2%                | 3%                | 0%                | 0%                |
| Halo removal/replacement                     | 2%                | 3%                | 0%                | 0%                |
| Nerve graft                                  | 2%                | 3%                | 0%                | 0%                |
| Shunt revision/removal                       | 2%                | 3%                | 0%                | 0%                |
| Brain surgery (specific reason unspecified)  | 1%                | 1%                | 10%               | 10%               |
| Arteriovenous malformation removal           | 1%                | 1%                | 0%                | 0%                |
| <b>Nutrition and hydration</b>               | <b>12 (2%)</b>    | <b>12 (2%)</b>    | <b>3 (3%)</b>     | <b>3 (3%)</b>     |
| Dehydration                                  | 75%               | 75%               | 33%               | 33%               |
| Electrolyte abnormality, unspecified         | 8%                | 8%                | 0%                | 0%                |
| Hypernatremia                                | 8%                | 8%                | 33%               | 33%               |

|                                                                           |                 |                 |               |               |
|---------------------------------------------------------------------------|-----------------|-----------------|---------------|---------------|
| Hyponatremia                                                              | 8%              | 8%              | 33%           | 33%           |
| <b>Orthopedic</b>                                                         | <b>51 (7%)</b>  | <b>45 (7%)</b>  | <b>2 (2%)</b> | <b>2 (2%)</b> |
| Unknown                                                                   | 33%             | 34%             | 50%           | 50%           |
| Arm                                                                       | 12%             | 13%             | 0%            | 0%            |
| Shoulder surgery                                                          | 12%             | 13%             | 0%            | 0%            |
| Clavicle                                                                  | 8%              | 9%              | 50%           | 50%           |
| Reconstructive                                                            | 6%              | 4%              | 0%            | 0%            |
| Elbow                                                                     | 4%              | 4%              | 0%            | 0%            |
| Foot surgery                                                              | 4%              | 4%              | 0%            | 0%            |
| Heterotopic ossification                                                  | 4%              | 4%              | 0%            | 0%            |
| Knee surgery                                                              | 4%              | 4%              | 0%            | 0%            |
| Ankle                                                                     | 2%              | 2%              | 0%            | 0%            |
| Hand surgery                                                              | 2%              | 2%              | 0%            | 0%            |
| Hip surgery                                                               | 2%              | 2%              | 0%            | 0%            |
| Thigh surgery                                                             | 2%              | 2%              | 0%            | 0%            |
| Total hip replacement                                                     | 2%              | 2%              | 0%            | 0%            |
| Wrist surgery                                                             | 2%              | 2%              | 0%            | 0%            |
| <b>Otolaryngological</b>                                                  | <b>10 (1%)</b>  | <b>10 (2%)</b>  | <b>0</b>      | <b>0</b>      |
| Facial reconstruction                                                     | 40%             | 40%             | 0%            | 0%            |
| Facial nerve decompression/graft                                          | 30%             | 30%             | 0%            | 0%            |
| Neck surgery                                                              | 10%             | 10%             | 0%            | 0%            |
| Tonsillectomy                                                             | 10%             | 10%             | 0%            | 0%            |
| Vocal cord procedure                                                      | 10%             | 10%             | 0%            | 0%            |
| <b>Psychiatric</b>                                                        | <b>53 (7%)</b>  | <b>43 (7%)</b>  | <b>6 (5%)</b> | <b>5 (5%)</b> |
| Unknown                                                                   | 42%             | 40%             | 33%           | 33%           |
| Addiction rehabilitation (alcohol or drug)                                | 15%             | 15%             | 17%           | 17%           |
| Agitation/aggression                                                      | 15%             | 17%             | 33%           | 33%           |
| Danger to self and others                                                 | 13%             | 13%             | 0%            | 0%            |
| Depression                                                                | 6%              | 6%              | 17%           | 17%           |
| Schizophrenia                                                             | 4%              | 2%              | 0%            | 0%            |
| Anxiety                                                                   | 2%              | 2%              | 0%            | 0%            |
| Eating disorder                                                           | 2%              | 2%              | 0%            | 0%            |
| Impulse control                                                           | 2%              | 2%              | 0%            | 0%            |
| <b>Pulmonary</b>                                                          | <b>31 (4%)</b>  | <b>22 (3%)</b>  | <b>4 (3%)</b> | <b>4 (4%)</b> |
| Tracheal stenosis/ tracheoplasty                                          | 65%             | 71%             | 75%           | 75%           |
| Respiratory distress/hypoxia                                              | 19%             | 17%             | 0%            | 0%            |
| Asthma                                                                    | 13%             | 8%              | 0%            | 0%            |
| Lung collapse                                                             | 3%              | 4%              | 25%           | 25%           |
| <b>Vascular</b>                                                           | <b>20 (3%)</b>  | <b>19 (3%)</b>  | <b>6 (5%)</b> | <b>6 (6%)</b> |
| Venous thromboembolism (deep venous thrombosis and/or pulmonary embolism) | 60%             | 63%             | 67%           | 67%           |
| Hypertension                                                              | 35%             | 32%             | 33%           | 33%           |
| Dialysis fistula placement                                                | 5%              | 5%              | 0%            | 0%            |
| <b>Unknown</b>                                                            | <b>76 (10%)</b> | <b>68 (11%)</b> | <b>9 (8%)</b> | <b>9 (8%)</b> |

|              |            |            |             |             |
|--------------|------------|------------|-------------|-------------|
| <b>Total</b> | <b>775</b> | <b>638</b> | <b>117*</b> | <b>110*</b> |
|--------------|------------|------------|-------------|-------------|

\*=Approximate date is unknown for 115 (14.8%) rehospitalizations.
